# Supplementary material for: Mechanistic aspects of maltotriose-conjugate translocation to the Gram-negative bacteria cytoplasm
Source: PubMed Central journal article supplement (PMC6311466; doi:10.26508/lsa.201800242), 2018-12-28
Supplement: LSA-2018-00242_TableS1.pdf [file LSA-2018-00242_TableS1.pdf]

## Table

**Table S1. Summary of the interaction of Cpd-1 or Cpd-2 with LamB revealed from the ion current fluctuation.**

|                                            | $k_{on}$ [ $10^6 \text{ M}^{-1}\text{s}^{-1}$ ] |          | Residence time $\tau$ [ $\mu\text{s}$ ] |          |
|--------------------------------------------|-------------------------------------------------|----------|-----------------------------------------|----------|
|                                            | +100 mV                                         | -100 mV  | +100 mV                                 | -100 mV  |
| <b>Maltotriose</b><br>cis-side addition    | 1.8±0.6                                         | 3.0±0.8  | 79±16                                   | 103±43   |
| <b>Cpd-1</b><br>cis-side addition          | 0.8±0.3                                         | 1.2±0.5  | 89±29                                   | 121±59   |
| <b>Maltohexaose</b><br>cis-side addition   | 2.7±1.1                                         | 3.0±0.8  | 928±120                                 | 1330±140 |
| <b>Cpd-2</b><br>cis-side addition          | 10.3±3.2                                        | 8.7±2.8  | 1007±131                                | 997±217  |
| <b>Maltotriose</b><br>trans-side addition  | 6.3±1.8                                         | 4.1±1.7  | 100±20                                  | 81±11    |
| <b>Cpd-1</b><br>trans-side addition        | 2.6±0.4                                         | 3.0±0.9  | 198±57                                  | 153±76   |
| <b>Maltohexaose</b><br>trans-side addition | 4.6±1.7                                         | 5.9±2.8  | 540±205                                 | 908±330  |
| <b>Cpd-2</b><br>trans-side addition        | 14.8±6.7                                        | 15.3±3.4 | 278±55                                  | 300±59   |

The association rate ( $k_{on}$ ) and residence time ( $\tau$ ) are calculated from single channel recording. The experiments have been done in 1 M KCl, 10 mM HEPES, pH 7 by applying +/-100 mV external voltage.
